# Supplementary material for: Synthesis and characterisation of β-aminophosphine ligands on a solid support †
Source: Royal Society of Chemistry journal article supplement (doi:10.1039/b009640g), 2001-01-01
Supplement: b009640g.doc [file b009640g.doc]

# **Supplementary data**

### Relevant procedures

N-benzyl-2chloroethylamine (**2**)

Thionyl chloride (14 ml, 194 mmol) was added dropwise to a solution of N-benzylethanolamine (3.79 g, 25 mmol) in 30 ml chloroform at 00C. After 30 min of stirring, the temperature was raised to 600 and the mixture was stirred for another 2 h. The colorless precipitate was filtered, dried in vacuo and identified as practically pure N-benzyl-2chloroethyl ammonium chloride (**1**).

Deprotonation was performed using 10% NaOH aqueous solution, followed by extraction with diethyl ether. The organic phase was washed with brine, dried on MgSO4, stripped of the solvent and dried in vacuo to yield pure **2** (45%).

**1:** 1 H NMR (200 MHz, CDCl3):  7.49(m, 5H, Ph); 4.18(m, 2H, CH2Ph); 3.89(t,

J = 6.9 Hz, 2H, OCH2); 3.15(m, 2H, NCH2).

13C NMR (100 MHz, dmso-d6):  132.1, 130.6, 129.4, 129.0, 50.3, 47.8, 39.5.

IR (KBr): 3446, 2929, 2751, 1455, 1022 cm-1.

**2:** 1H NMR (200 MHz, CDCl3):  7.29(m, 5H, Ph); 3.82(s, 2H, CH2Ph); 3.67(t, J = 5.7 Hz, 2H, CH2Cl); 2.96(t, J = 5.6Hz, 2H, NCH2).

13C NMR (100 MHz, CDCl3):  140.0, 128.8, 128.4, 127.5, 53.4, 50.4, 45.0.

IR (neat): 3316, 3027, 2838, 1454, 1294, 1124 cm-1.

General phosphination procedure in solution (**3**)

Under Argon.

Li wire (0.04 g, 5.7 mmol), cut into small pieces, was added to a solution of the appropriate triarylphosphine (1.19 mmol) in 2.6 ml THF. After 3 h of stirring, the red-brown mixture was filtered through a glass-wool. A solution of **2** (0.2 g, 1.19 mmol) in 5 ml THF was added dropwise to the filtrate and the stirring continued overnight. The cold water-quenched mixture was extracted with ether. The organic phase was dried over MgSO4 and stripped of the solvent to yield the phosphine ligand. Yields of 25% up to quantitative were achieved, depending on the extent of oxidation. If necessary, purification on a silica gel column (ether/hexanes) was performed.

**3a:**  1H NMR (200 MHz, CDCl3):  7.39(m, 15H, Ar); 3.75(s, 2H, CH2Ph); 2.77(dt, J(HH) = 7.2 Hz, J(HP) = 8 Hz, 2H, CH2N); 2.20(t, J= 7.5 Hz, 2H, PCH2).

31 P NMR (202.5 MHz, CDCl3 ):  -20.3(s).

**3b:** 1 H NMR (200 MHz, CDCl3):  7.24(m, 13H, Ar); 3.76(s, 2H, CH2Ph); 3.37(s, 1H, NH); 2.79(dt, J(HP) = 8.3 Hz, J(HH) = 7.0 Hz, 2H, CH2N); 2.39(s, 6H, CH3); 2.23(t, J(HH) = 7.5 Hz, 2H, P- CH2).

13C NMR (50.4 MHz, Benzene-d6):  142.5(d, J= 10.3 Hz), 141.2, 137.6(d, J= 5.8 Hz), 131.5, 130.3, 128.6, 128.4, 128.3, 126.9, 126.4, 53.9, 46.5(d, J= 8.3 Hz), 30.1(d, J= 5.2 Hz), 21.3(d, J= 8.8 Hz).

31P NMR (202.5 MHz, Benzene-d6):  -41.7(s).

**10** (Merrifield resin, ethanolamine, lithium di-*o*-tolylphosphide)

## Under Argon.

Freshly cut Li wire (0.12 g, 17.2 mmol, 48 eq) was added to a solution of tri-*o*-tolylphosphine (1.095 g, 3.6 mmol, 10 eq) in 8 ml of THF. After stirring for 3 h, the residue lithium was filtered off and the filtrate was added to a suspension of resin (0.36 mmol) in a minimal volume of THF. The suspension was stirred for 24 h. The resin was filtered off and washed with water, acetone, chloroform, benzene and ether and dried in vacuo. Quantitative yield.

Gel-phase 31P NMR (202 MHz, C6D6):  -40.7(s)

Partial gel-phase 13C NMR (125 MHz, C6D6):  142.3, 141.0, 137.3, 131.4, 130.3, 126.4, 57.9, 50.9, 24.7, 21.3.

IR (KBr): 3460, 3023, 2930, 2852, 1680, 1600, 1489, 1453, 1026 cm-1.

Anal. calcd. ( for loading of 0.62 mmol/g of C17H21NP on PS-DVB, prepared from Merrifield resin with a loading of 0.72 mmol/g) C 89.45, H 7.76, N 0.87. Found C 89.11, H 7.48, N 0.77.

**7** (Merrifield resin, N-benzyl ethanolamine, lithium diphenylphosphide)

Gel-phase 31P NMR (202 MHz, C6D6):  -19.9(s)

Partial gel-phase 13C NMR (100 MHz, C6D6):  145.1, 138.6, 132.2, 57.9, 54.7, 49.4, 25.5.

IR (KBr): 3025, 2922, 2848, 1600, 1493, 1452, 1026 cm-1.

**8** (Merrifield resin, valinol, lithium diphenylphosphide)

Gel-phase 31P NMR (202 MHz, C6D6):  -19.9(s)

Partial gel-phase 13C NMR (100 MHz, C6D6):  145.3, 63.3, 59.9, 30.6, 28.4, 18.9, 17.9.

IR (KBr): 3442, 3021, 2914, 1600, 1493, 1445, 1026 cm-1.

**9** (Wang resin, ethanolamine, lithium diphenylphosphide)

Gel-phase 31P NMR (202 MHz, C6D6):  -20.2(s)

Partial gel-phase 13C NMR (100 MHz, C6D6):  138.7, 132.4, 114.2, 69.3, 52.5, 45.6, 28.8.

IR (KBr): 3446, 3065, 2916, 1652, 1541, 1508, 1456 cm-1.
